# Supplementary material for: Mobile-platform measurement of air pollutant concentrations in California: performance assessment, statistical methods for evaluating spatial variations, and spatial representativeness
Source: Copernicus journal article supplement (doi:10.5194/amt-13-3277-2020), 2020-06-30
Supplement: Supplementary file 1 [file amt-13-3277-2020-supplement.pdf]

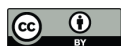

## *Supplement of*

# **Mobile-platform measurement of air pollutant concentrations in California: performance assessment, statistical methods for evaluating spatial variations, and spatial representativeness**

**Paul A. Solomon et al.**

*Correspondence to:* Charles L. Blanchard ([charles.ld.blanchard@gmail.com](mailto:charles.ld.blanchard@gmail.com))

The copyright of individual parts of the supplement might differ from the CC BY 4.0 License.

Table S1. Manufacturer specifications for the instruments deployed in the vehicles.

| Pollutant     | Detection Principle                            | Resolution                | Range                                                       | Response Time                    | Instrument                                  |
|---------------|------------------------------------------------|---------------------------|-------------------------------------------------------------|----------------------------------|---------------------------------------------|
| BC            | Photoacoustic absorption spectroscopy          | $0.2 \mu\text{g m}^{-3}$  | $<1 - 10,000 \text{ Mm}^{-1}$                               | $<10 \text{ s}$ (1 s resolution) | Model PAX, Droplet Measurement Technologies |
| PN            | Optical scatter particle counting              | 21 counts $\text{L}^{-1}$ | $0 - 105,900 \text{ counts L}^{-1}$                         | 1 s                              | Model GT-526S, MetOne                       |
| NO            | Chemiluminescence                              | 0.001 ppmv                | $0 - 0.5 \text{ ppmv}$ to 0 – 100 ppmv selectable (LOD = 2) | $<1 \text{ s}$                   | Model CLD64, Eco Physics AG                 |
| $\text{NO}_2$ | Cavity attenuated phase shift spectroscopy     | 0.010 ppbv                | $0 - 1 \text{ ppmv}$                                        | $<30 \text{ s}$ to 95%           | Model T500U, Teledyne Inc.                  |
| $\text{O}_3$  | UV absorption                                  | 0.1 ppbv                  | $0.001 - 2 \text{ ppmv}$                                    | 4 s                              | Model 211, 2B Technologies                  |
| $\text{CH}_4$ | Off-axis integrated cavity output spectroscopy | 0.1 ppbv                  | $0.01 - 100 \text{ ppmv}$                                   | 10 s                             | Model 915-0011, Los Gatos Research          |

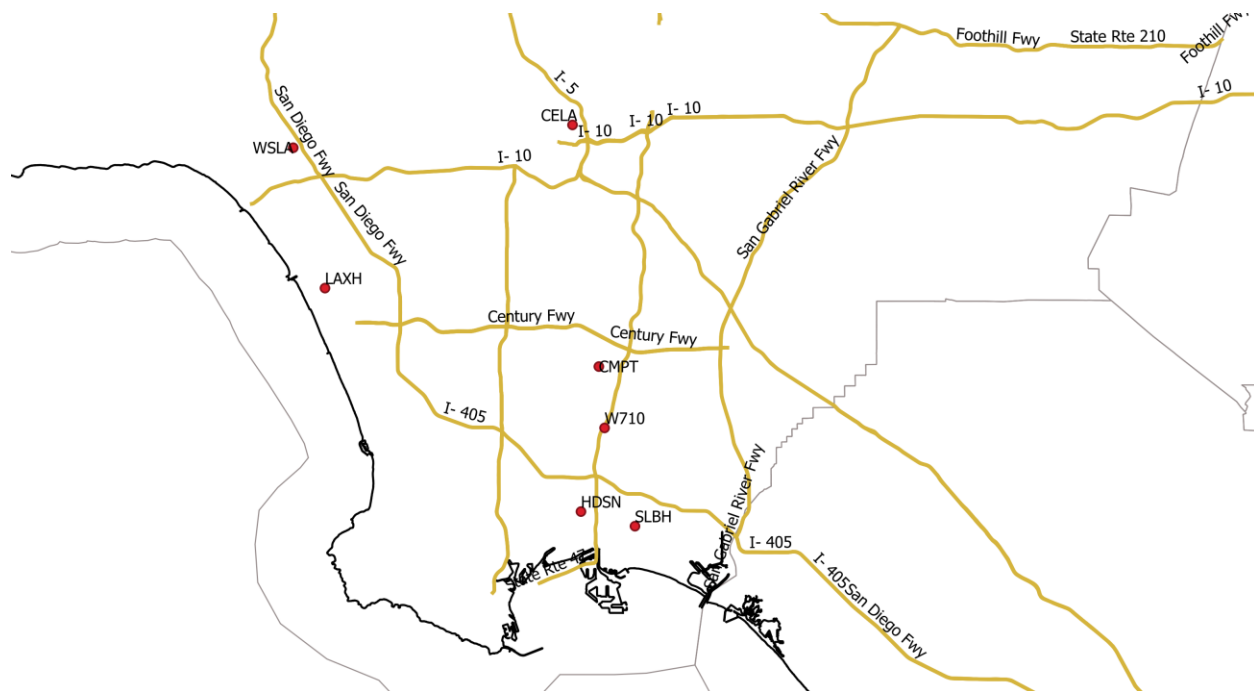

Figure S1. Locations of SCAQMD monitoring sites for which one-minute resolution data were provided by the SCAQMD. Map generated with QGIS version 3.2.2 (<https://qgis.org/en/site/>) open-source software licensed under the GNU General Public License (<http://www.gnu.org/licenses>). California coastline shapefile obtained from the OpenStreetMap community ([www.openstreetmap.org](http://www.openstreetmap.org)) and MapCruzin ([www.mapcruzin.com](http://www.mapcruzin.com)), licensed under the Creative Commons Attribution Share-Alike 2.0 license. U.S. highways shapefile obtained from U.S. Bureau of the Census TIGER/Line shapefiles public data (<https://www.census.gov/geographies/mapping-files/time-series/geo/tiger-line-file.html>).

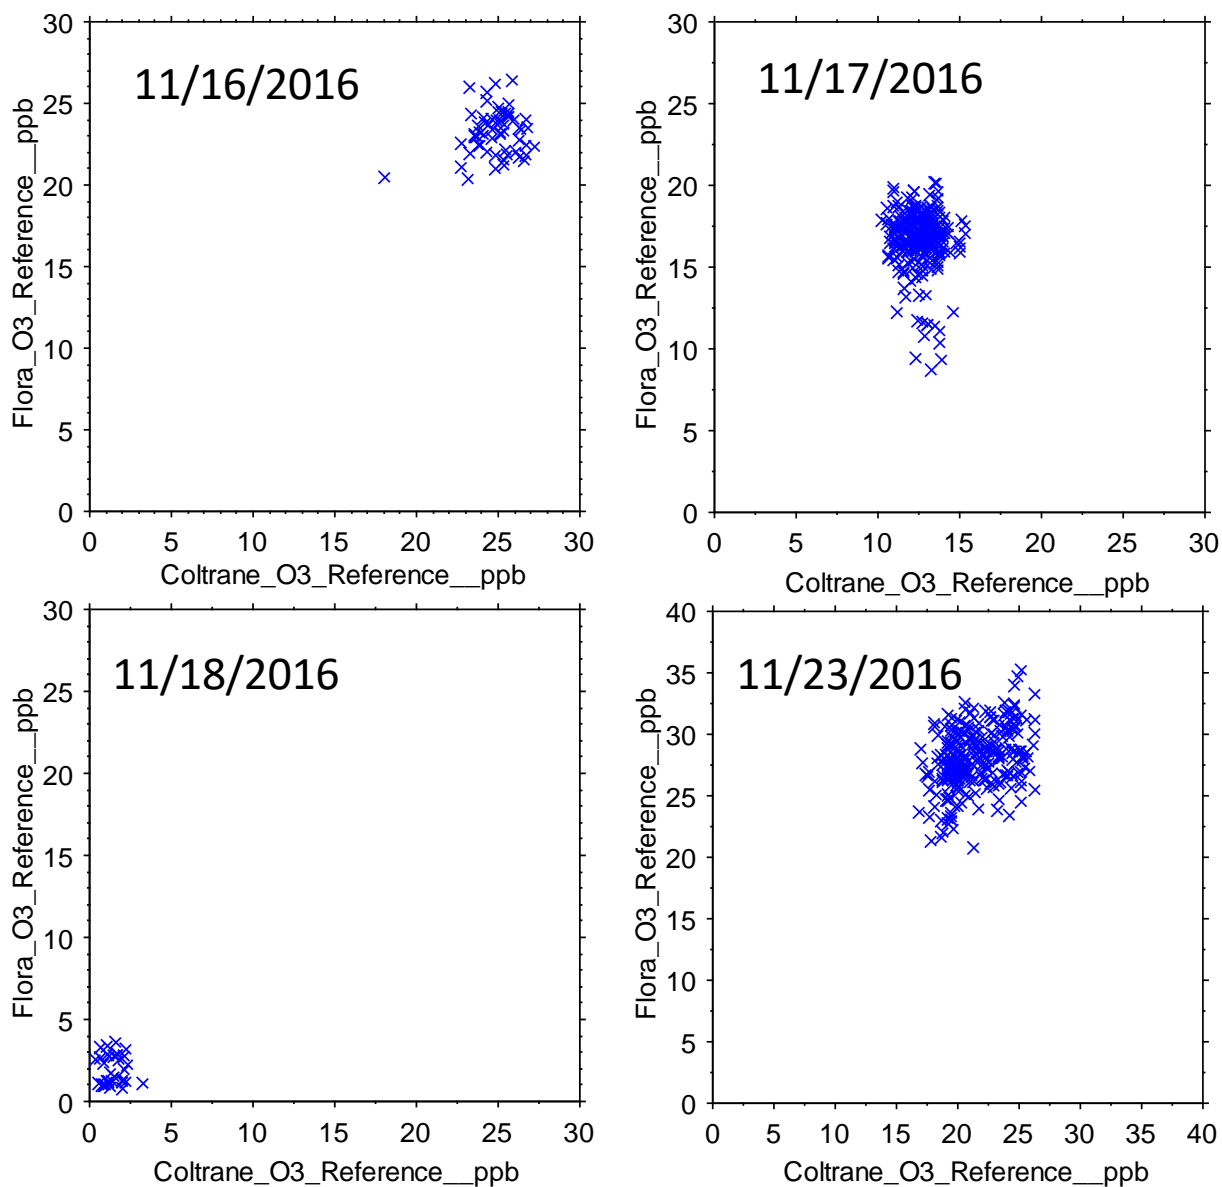

Figure S2. Comparison of paired 1-sec  $O_3$  measurements recorded by two mobile platforms while parked in the San Francisco garage during the first two weeks of the San Joaquin Valley sampling period. One vehicle did not record  $O_3$  measurements while parked on two days.

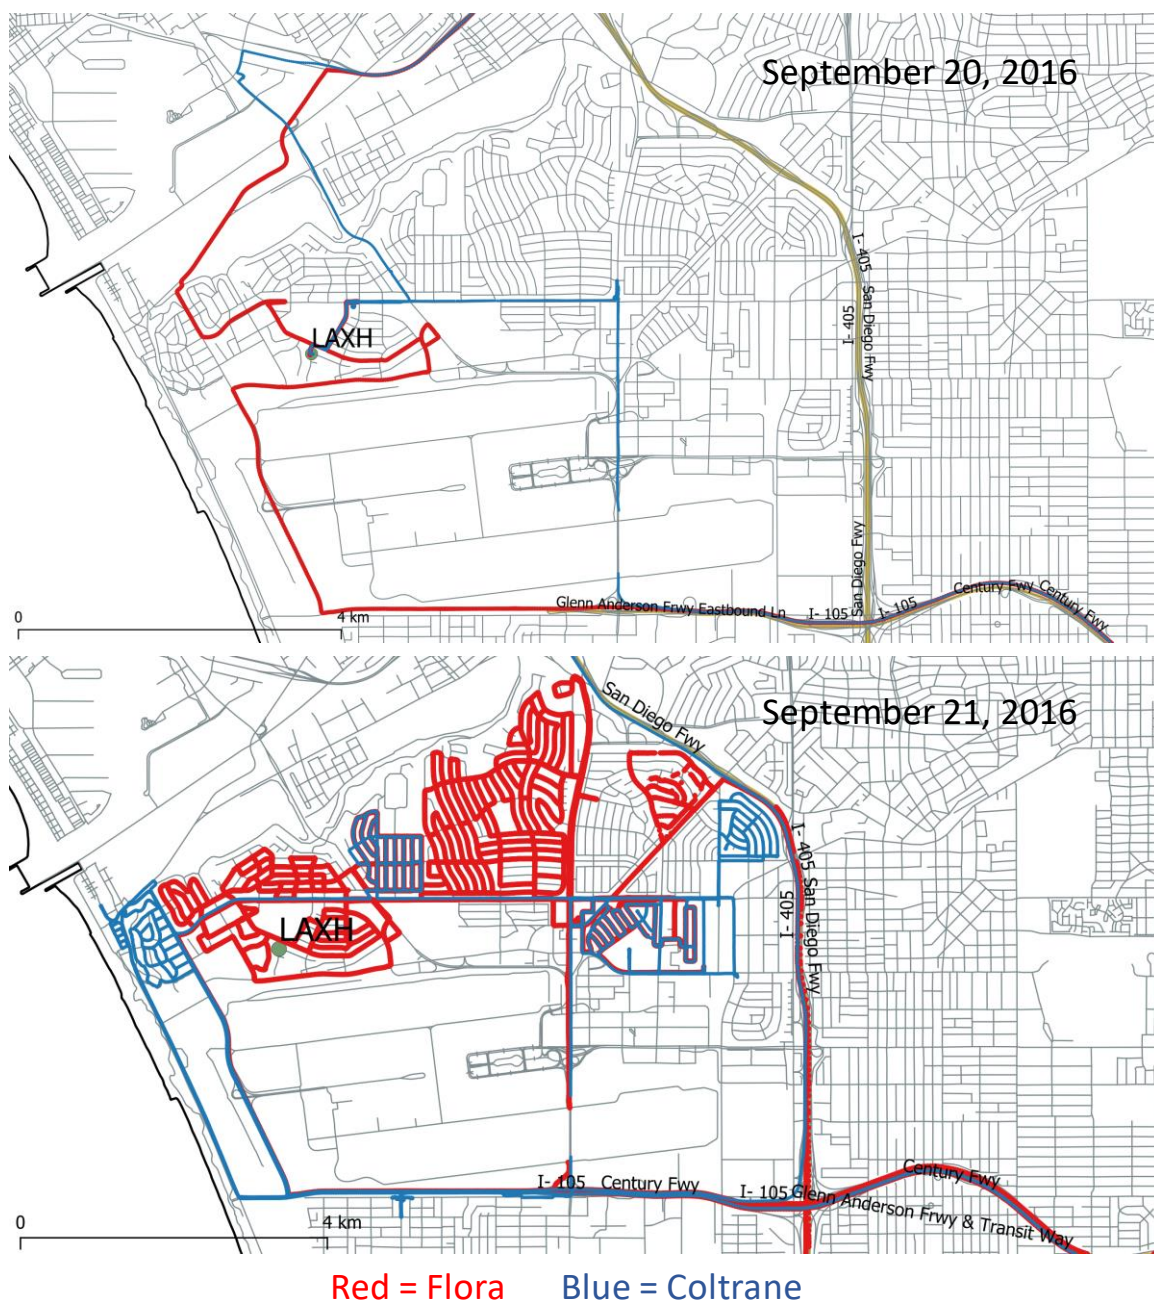

Figure S3. Los Angeles driving routes on September 20 and 21, 2016 (red = Flora, blue = Coltrane). Each 1-s measurement is marked by a point; because the points are closely spaced, the routes appear as smooth lines. The air quality monitor (LAXH) is shown (see satellite view in Figure S4). On September 20, the cars parked next to the monitor for an audit check. Map generated with QGIS version 3.2.2 (<https://qgis.org/en/site/>) open-source software licensed under the GNU General Public License (<http://www.gnu.org/licenses>). California coastline shapefile obtained from the OpenStreetMap community ([www.openstreetmap.org](http://www.openstreetmap.org)) and MapCruzin ([www.mapcruzin.com](http://www.mapcruzin.com)), licensed under the Creative Commons Attribution Share-Alike 2.0 license. U.S. highways shapefile obtained from U.S. Bureau of the Census TIGER/Line shapefiles public data (<https://www.census.gov/geographies/mapping-files/time-series/geo/tiger-line-file.html>).



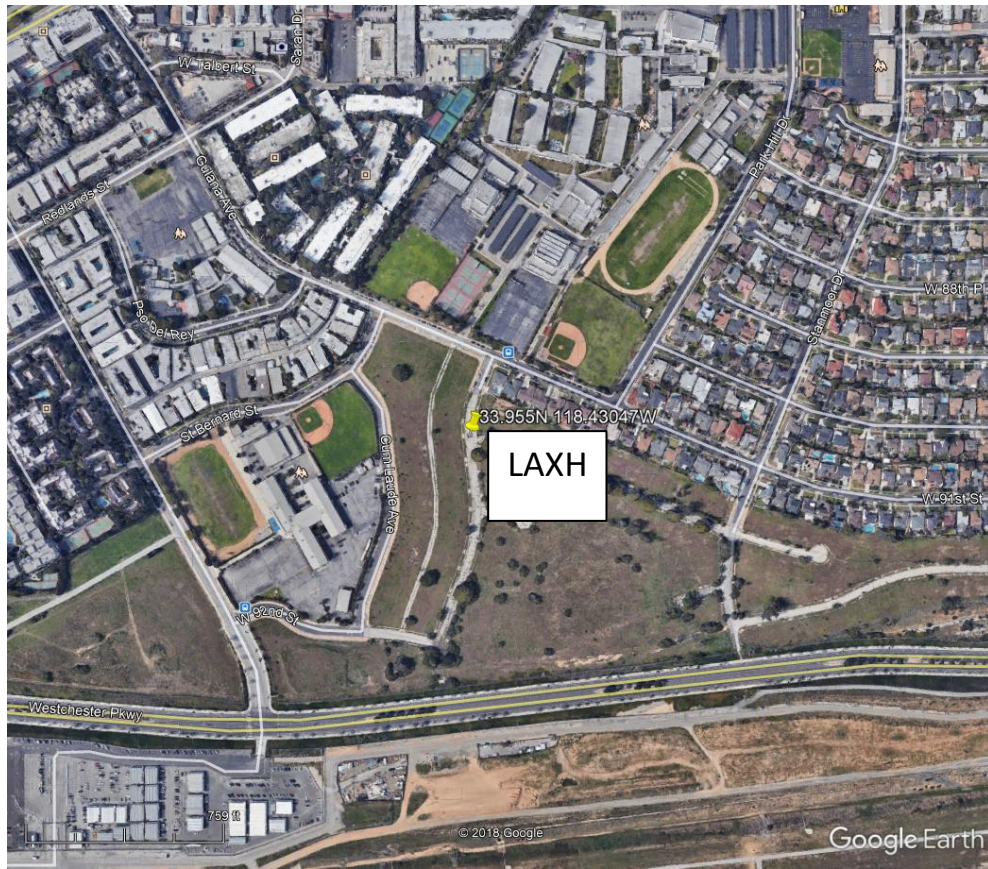

Figure S4. Satellite view showing location of LAXH and surrounding areas (courtesy GoogleEarth).

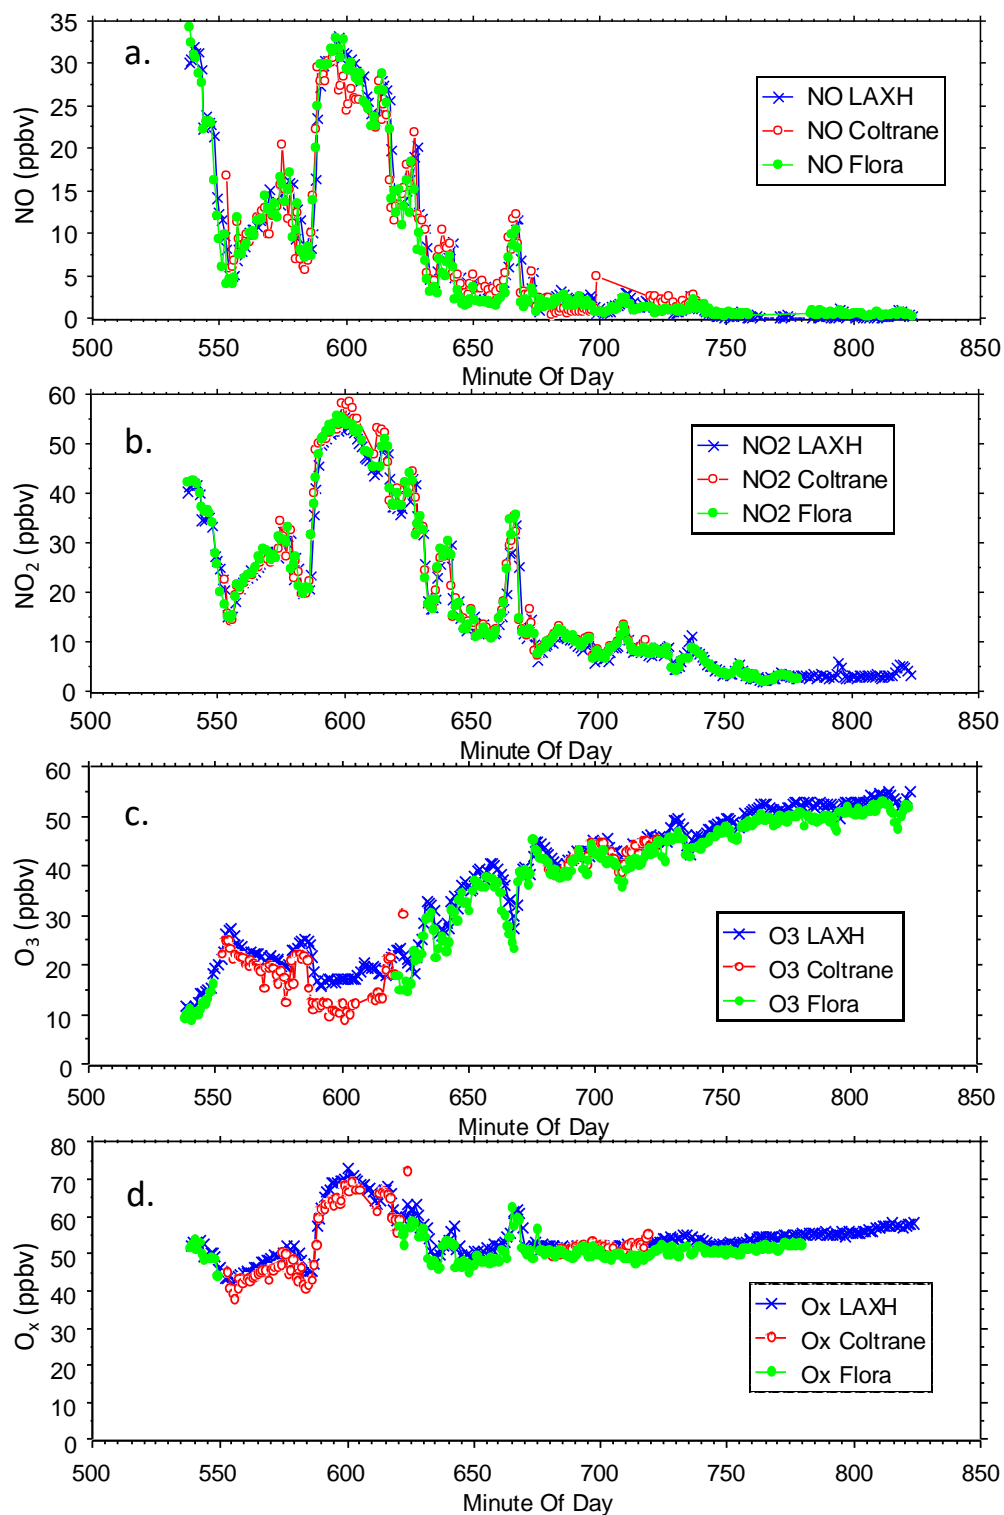

Figure S5. NO, NO<sub>2</sub>, O<sub>3</sub>, and O<sub>x</sub> on September 20, 2016 at LAXH as measured by a fixed-site monitor and the mobile platforms.

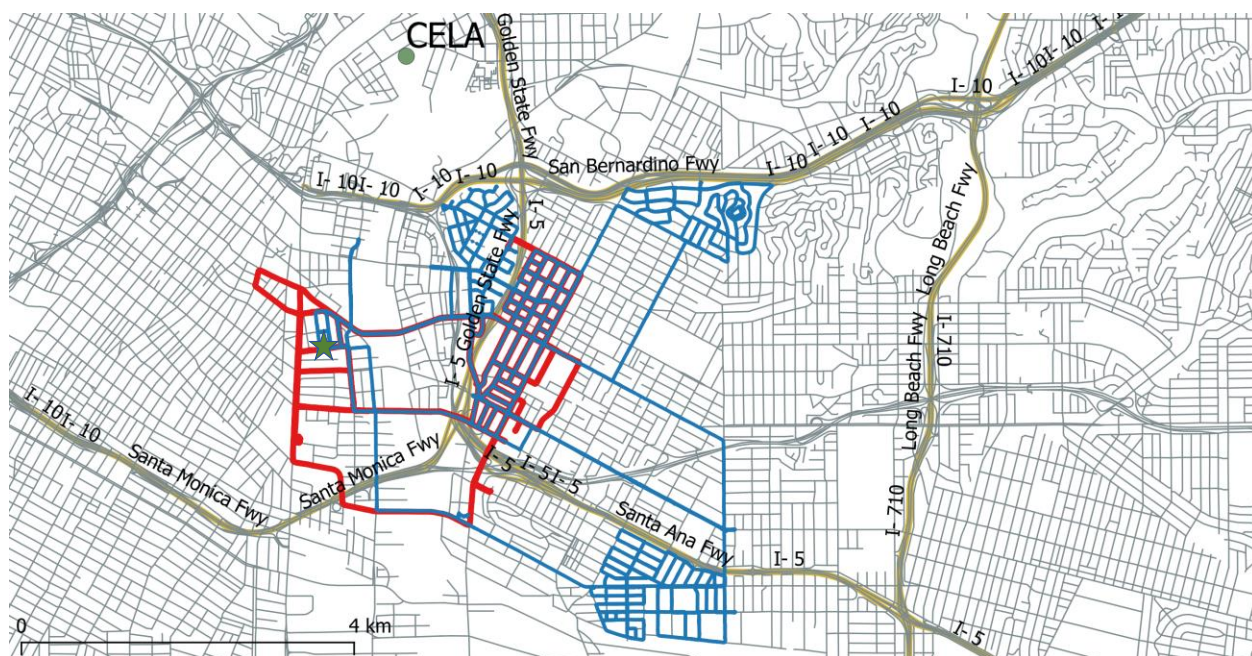

Figure S6. Los Angeles driving routes on August 3, 2016 (red = Flora, blue = Coltrane). Each 1-s measurement is marked by a point; because the points are closely spaced, the routes appear as smooth lines. The air quality monitor in downtown Los Angeles (CELA) is shown. The parking garage is located at the star. The garage is 3.0 km from CELA (direct distance). Map generated with QGIS version 3.2.2 (<https://qgis.org/en/site/>) open-source software licensed under the GNU General Public License (<http://www.gnu.org/licenses>). California coastline and state highway shapefiles obtained from the OpenStreetMap community ([www.openstreetmap.org](http://www.openstreetmap.org)) and MapCruzin ([www.mapcruzin.com](http://www.mapcruzin.com)), licensed under the Creative Commons Attribution Share-Alike 2.0 license. U.S. highways and California county boundary shapefiles obtained from U.S. Bureau of the Census TIGER/Line shapefiles public data (<https://www.census.gov/geographies/mapping-files/time-series/geo/tiger-line-file.html>).



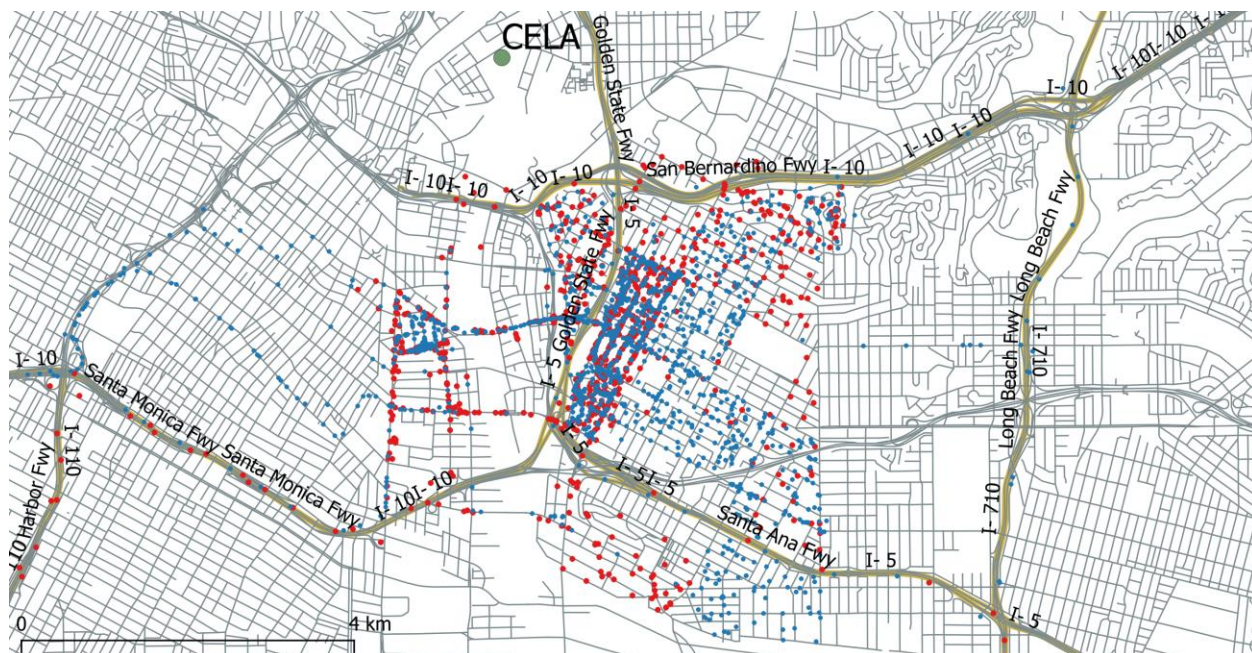

Figure S7. Locations of cars based on 1-minute averages during August 3 – 12, 2016 (red = Flora, blue = Coltrane). The air quality monitor in downtown Los Angeles (CELA) is shown. Map generated with QGIS version 3.2.2 (<https://qgis.org/en/site/>) open-source software licensed under the GNU General Public License (<http://www.gnu.org/licenses>). California coastline and state highway shapefiles obtained from the OpenStreetMap community ([www.openstreetmap.org](http://www.openstreetmap.org)) and MapCruzin ([www.mapcruzin.com](http://www.mapcruzin.com)), licensed under the Creative Commons Attribution Share-Alike 2.0 license. U.S. highways and California county boundary shapefiles obtained from U.S. Bureau of the Census TIGER/Line shapefiles public data (<https://www.census.gov/geographies/mapping-files/time-series/geo/tiger-line-file.html>).



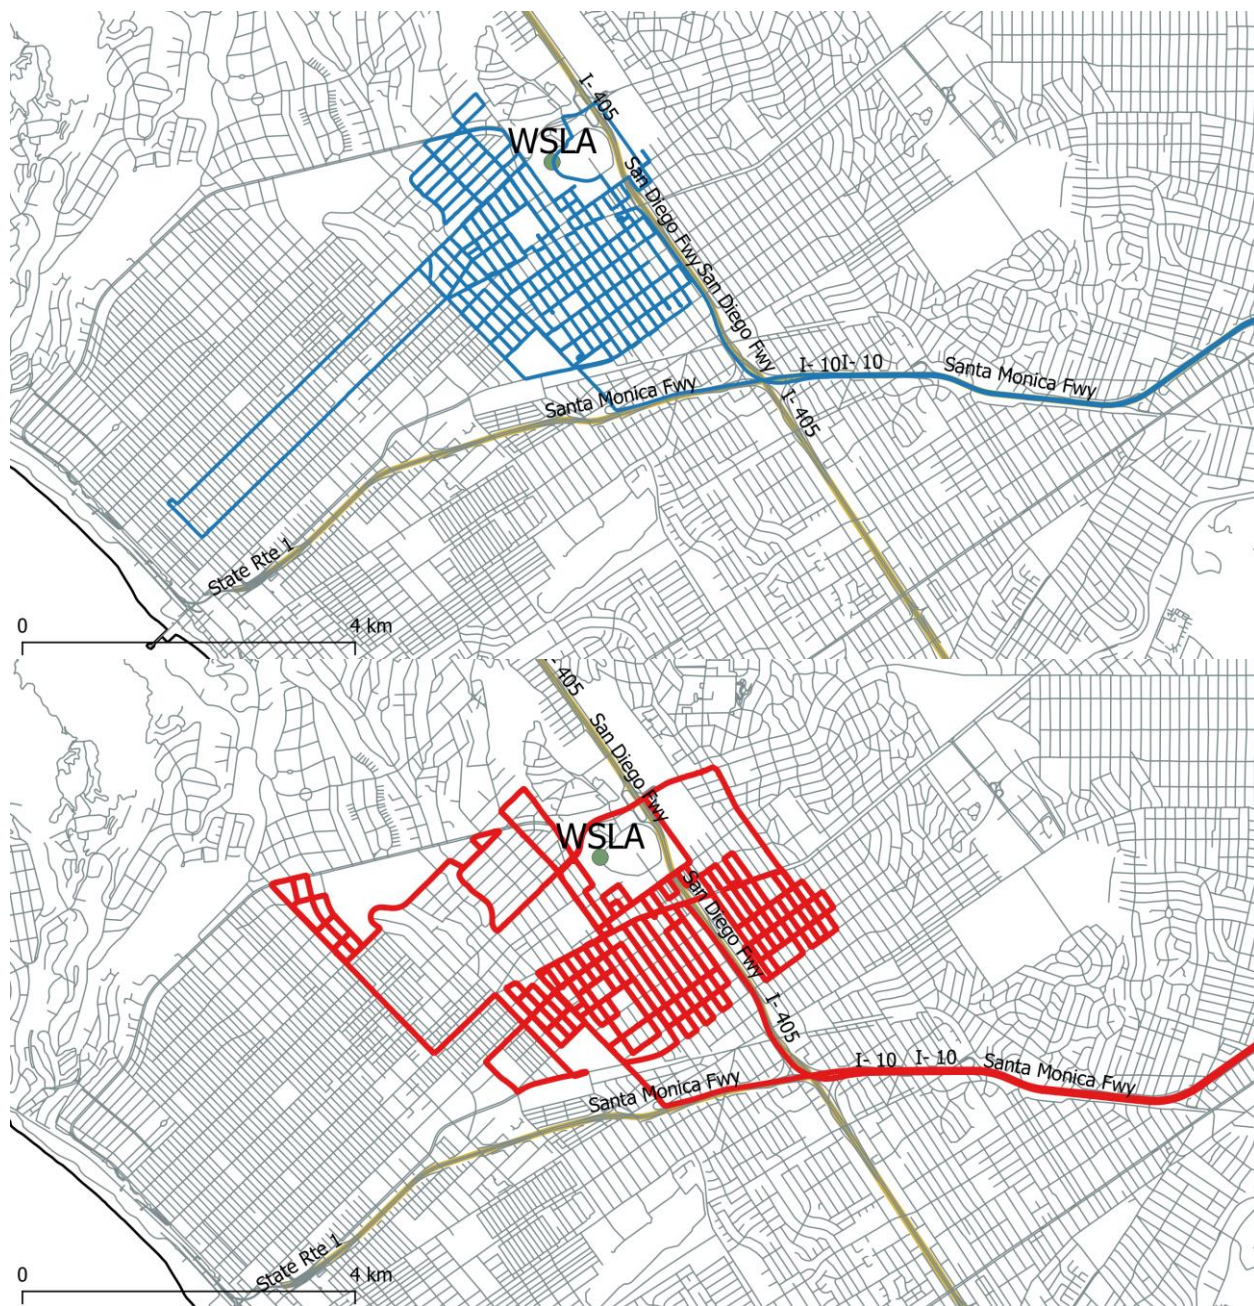

Figure S8. Los Angeles driving routes on September 13 (blue, Coltrane) and September 19 (red, Flora). The air quality monitor in downtown Los Angeles (CELA) is shown. Sattelite view is shown in Figure S9. Map generated with QGIS version 3.2.2 (<https://qgis.org/en/site/>) open-source software licensed under the GNU General Public License (<http://www.gnu.org/licenses>). California coastline and state highway shapefiles obtained from the OpenStreetMap community ([www.openstreetmap.org](http://www.openstreetmap.org)) and MapCruzin ([www.mapcruzin.com](http://www.mapcruzin.com)), licensed under the Creative Commons Attribution Share-Alike 2.0 license. U.S. highways and California county boundary shapefiles obtained from U.S. Bureau of the Census TIGER/Line shapefiles public data (<https://www.census.gov/geographies/mapping-files/time-series/geo/tiger-line-file.html>).



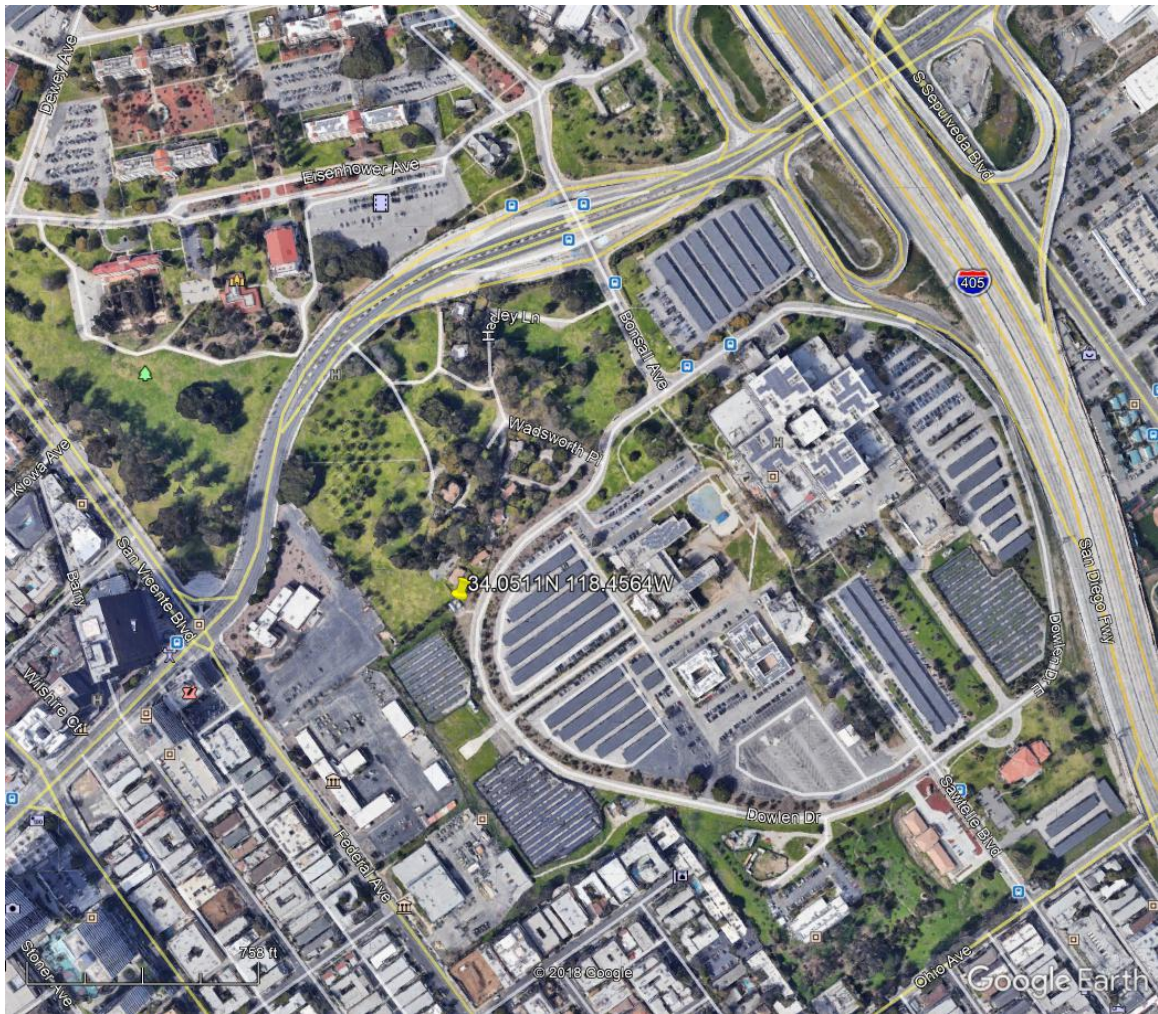

Figure S9. Satellite view of WSLA and surrounding areas (courtesy GoogleEarth).

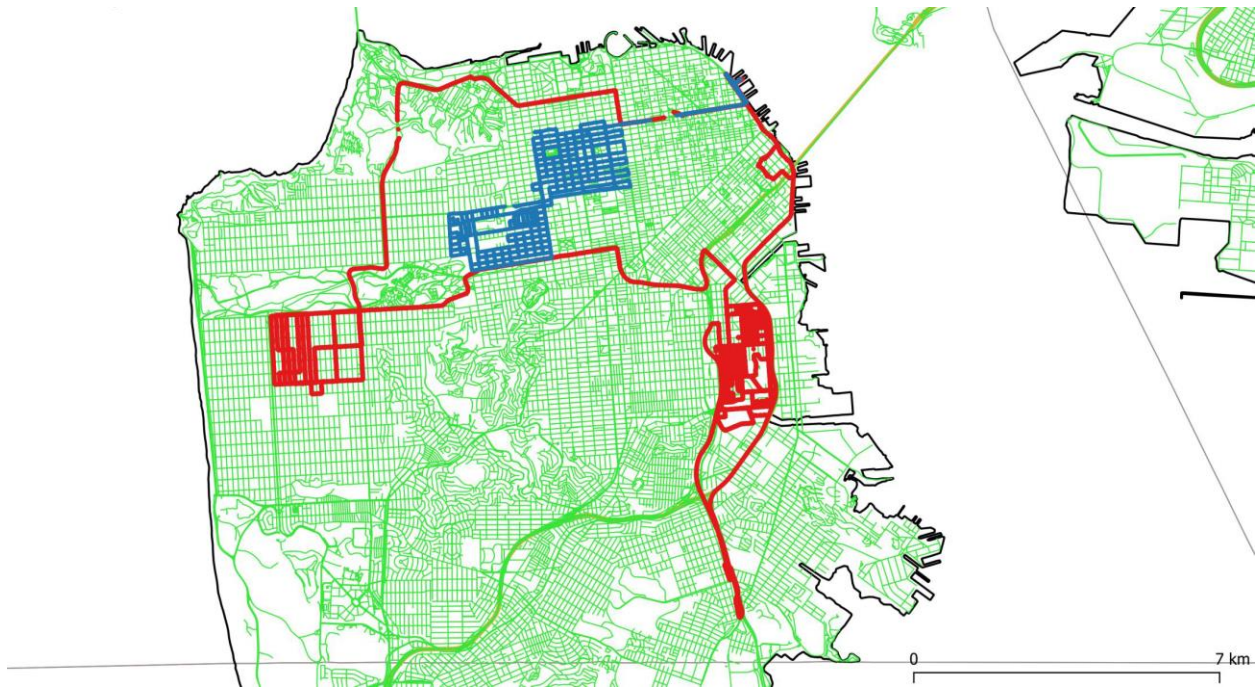

Figure S10. San Francisco driving routes on May 11, 2017. Red = Flora, blue = Coltrane. Map generated with QGIS version 3.2.2 (<https://qgis.org/en/site/>) open-source software licensed under the GNU General Public License (<http://www.gnu.org/licenses>). California coastline and state highway shapefiles obtained from the OpenStreetMap community ([www.openstreetmap.org](http://www.openstreetmap.org)) and MapCruzin ([www.mapcruzin.com](http://www.mapcruzin.com)), licensed under the Creative Commons Attribution Share-Alike 2.0 license. U.S. highways and California county boundary shapefiles obtained from U.S. Bureau of the Census TIGER/Line shapefiles public data (<https://www.census.gov/geographies/mapping-files/time-series/geo/tiger-line-file.html>).



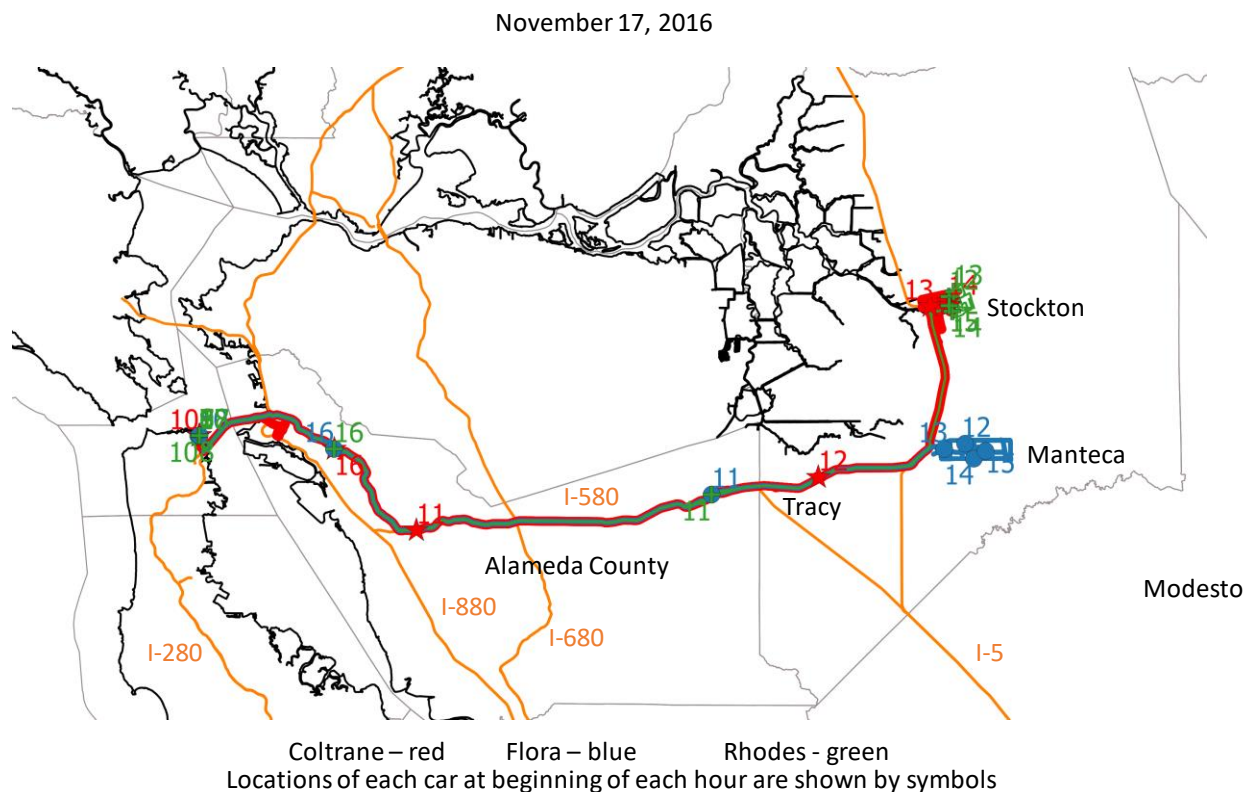

Figure S11. San Joaquin Valley driving routes on November 17, 2016. The positions of each car at the beginning of each hour are marked. The drives began and ended at the parking garage in San Francisco. Map generated with QGIS version 3.2.2 (<https://qgis.org/en/site/>) open-source software licensed under the GNU General Public License (<http://www.gnu.org/licenses>). California coastline and state highway shapefiles obtained from the OpenStreetMap community ([www.openstreetmap.org](http://www.openstreetmap.org)) and MapCruzin ([www.mapcruzin.com](http://www.mapcruzin.com)), licensed under the Creative Commons Attribution Share-Alike 2.0 license. U.S. highways and California county boundary shapefiles obtained from U.S. Bureau of the Census TIGER/Line shapefiles public data (<https://www.census.gov/geographies/mapping-files/time-series/geo/tiger-line-file.html>).



Coltrane – red      Flora – blue      Rhodes - green

Locations of each car at beginning of each hour are shown by symbols

14

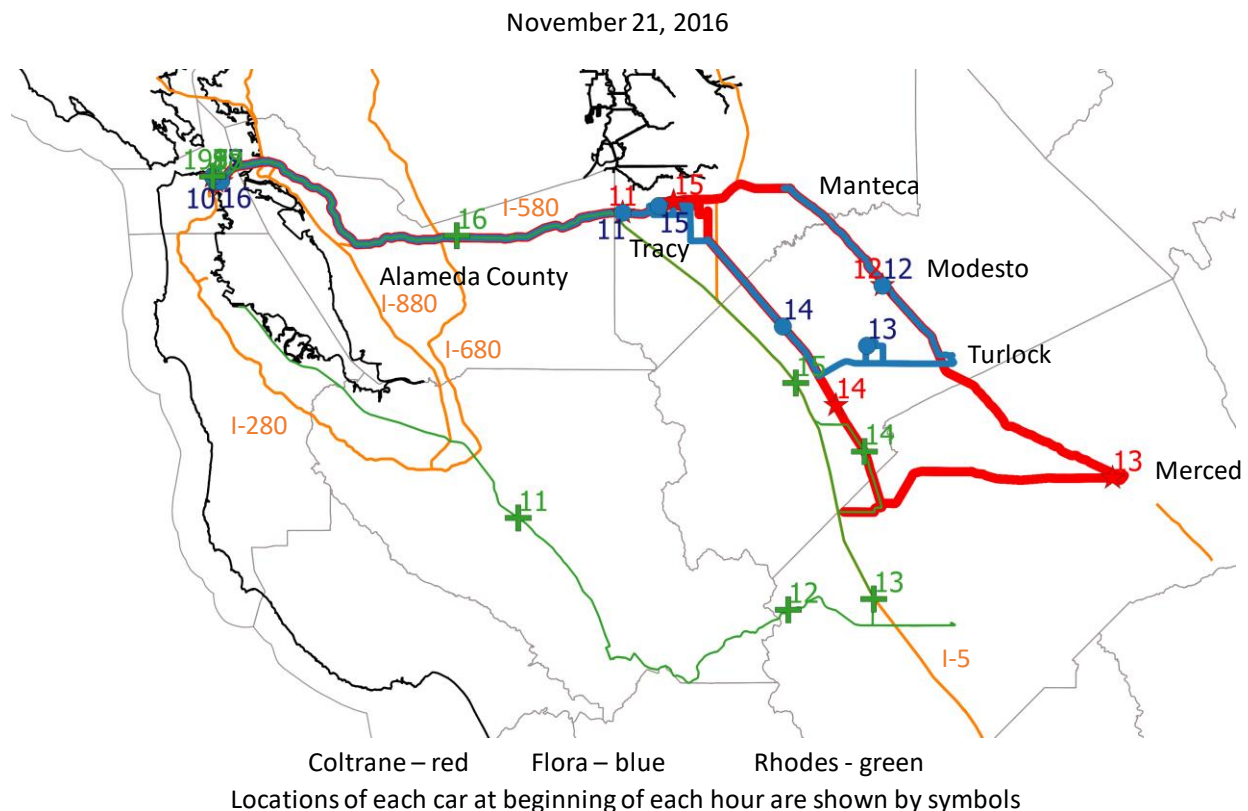

Figure S13. San Joaquin Valley driving routes on November 21, 2016. The positions of each car at the beginning of each hour are marked. The drives began and ended at the parking garage in San Francisco. Map generated with QGIS version 3.2.2 (<https://qgis.org/en/site/>) open-source software licensed under the GNU General Public License (<http://www.gnu.org/licenses>). California coastline and state highway shapefiles obtained from the OpenStreetMap community ([www.openstreetmap.org](http://www.openstreetmap.org)) and MapCruzin ([www.mapcruzin.com](http://www.mapcruzin.com)), licensed under the Creative Commons Attribution Share-Alike 2.0 license. U.S. highways and California county boundary shapefiles obtained from U.S. Bureau of the Census TIGER/Line shapefiles public data (<https://www.census.gov/geographies/mapping-files/time-series/geo/tiger-line-file.html>).

November 22, 2016

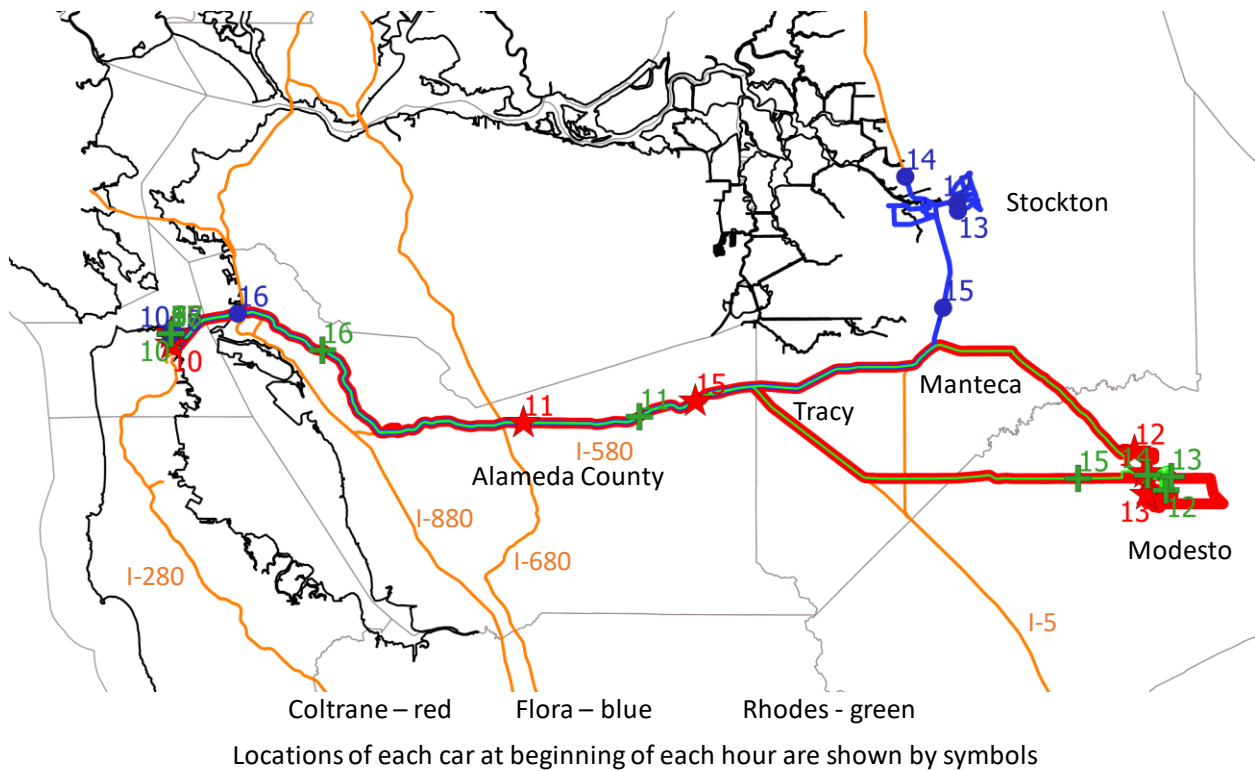

Figure S14. San Joaquin Valley driving routes on November 22, 2016. The positions of each car at the beginning of each hour are marked. The drives began and ended at the parking garage in San Francisco. Map generated with QGIS version 3.2.2 (<https://qgis.org/en/site/>) open-source software licensed under the GNU General Public License (<http://www.gnu.org/licenses>). California coastline and state highway shapefiles obtained from the OpenStreetMap community ([www.openstreetmap.org](http://www.openstreetmap.org)) and MapCruzin ([www.mapcruzin.com](http://www.mapcruzin.com)), licensed under the Creative Commons Attribution Share-Alike 2.0 license. U.S. highways and California county boundary shapefiles obtained from U.S. Bureau of the Census TIGER/Line shapefiles public data (<https://www.census.gov/geographies/mapping-files/time-series/geo/tiger-line-file.html>).

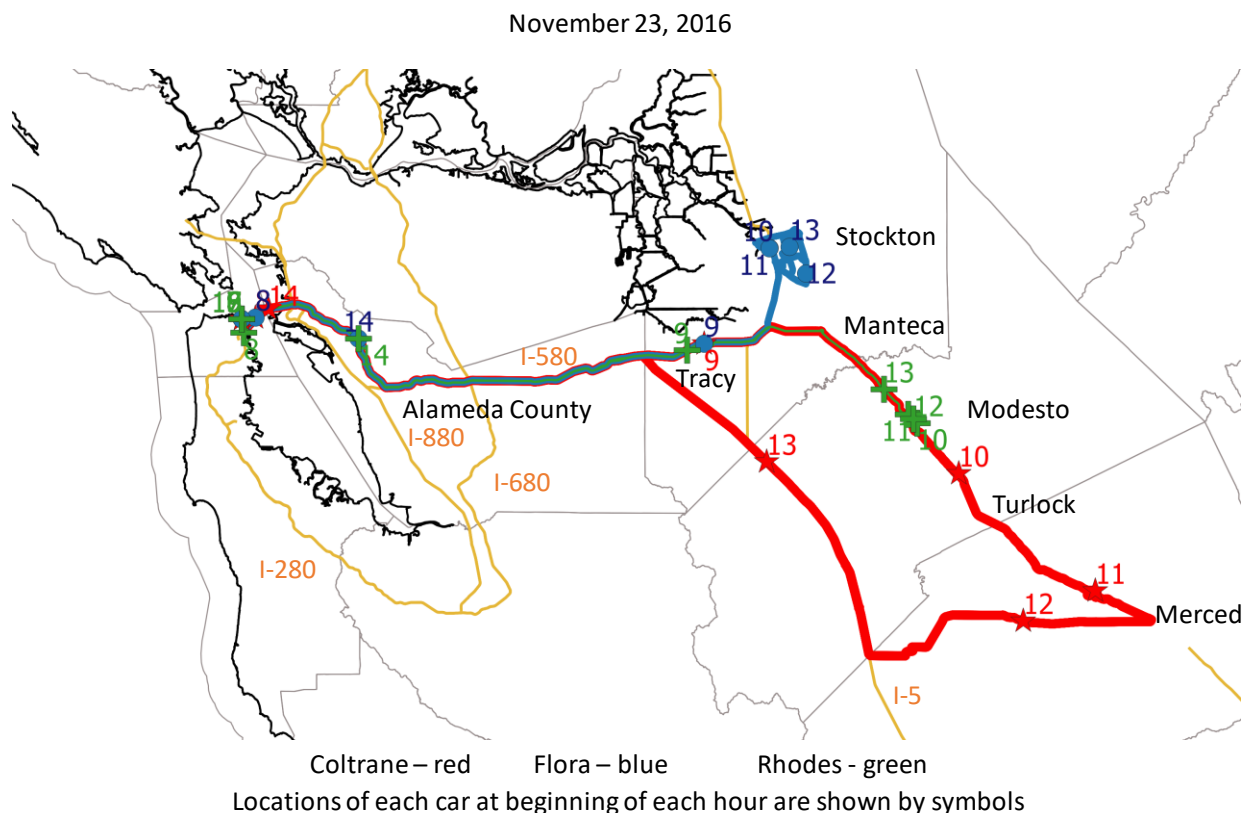

Figure S15. San Joaquin Valley driving routes on November 23, 2016. The positions of each car at the beginning of each hour are marked. The drives began and ended at the parking garage in San Francisco. Map generated with QGIS version 3.2.2 (<https://qgis.org/en/site/>) open-source software licensed under the GNU General Public License (<http://www.gnu.org/licenses>). California coastline and state highway shapefiles obtained from the OpenStreetMap community ([www.openstreetmap.org](http://www.openstreetmap.org)) and MapCruzin ([www.mapcruzin.com](http://www.mapcruzin.com)), licensed under the Creative Commons Attribution Share-Alike 2.0 license. U.S. highways and California county boundary shapefiles obtained from U.S. Bureau of the Census TIGER/Line shapefiles public data (<https://www.census.gov/geographies/mapping-files/time-series/geo/tiger-line-file.html>).

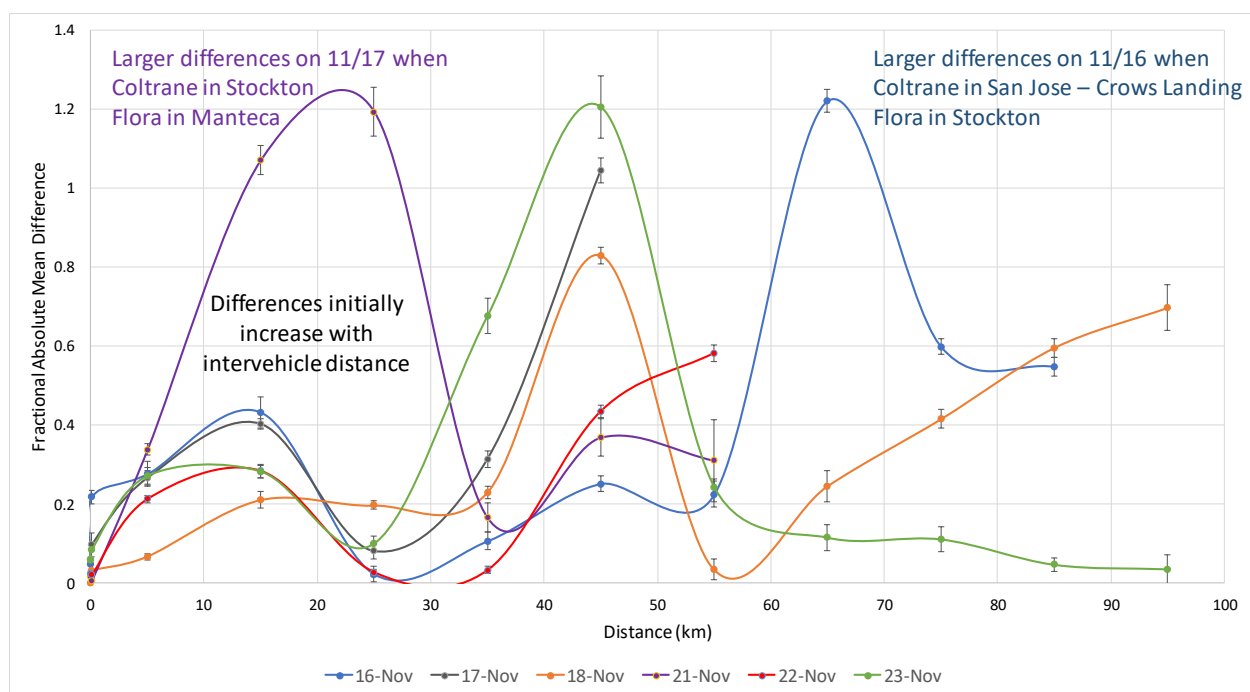

Figure S16. FAMD of  $\text{NO}_2$  measurements versus distance between vehicles on six sampling days in the San Joaquin Valley. Paired cars are Flora and Coltrane.



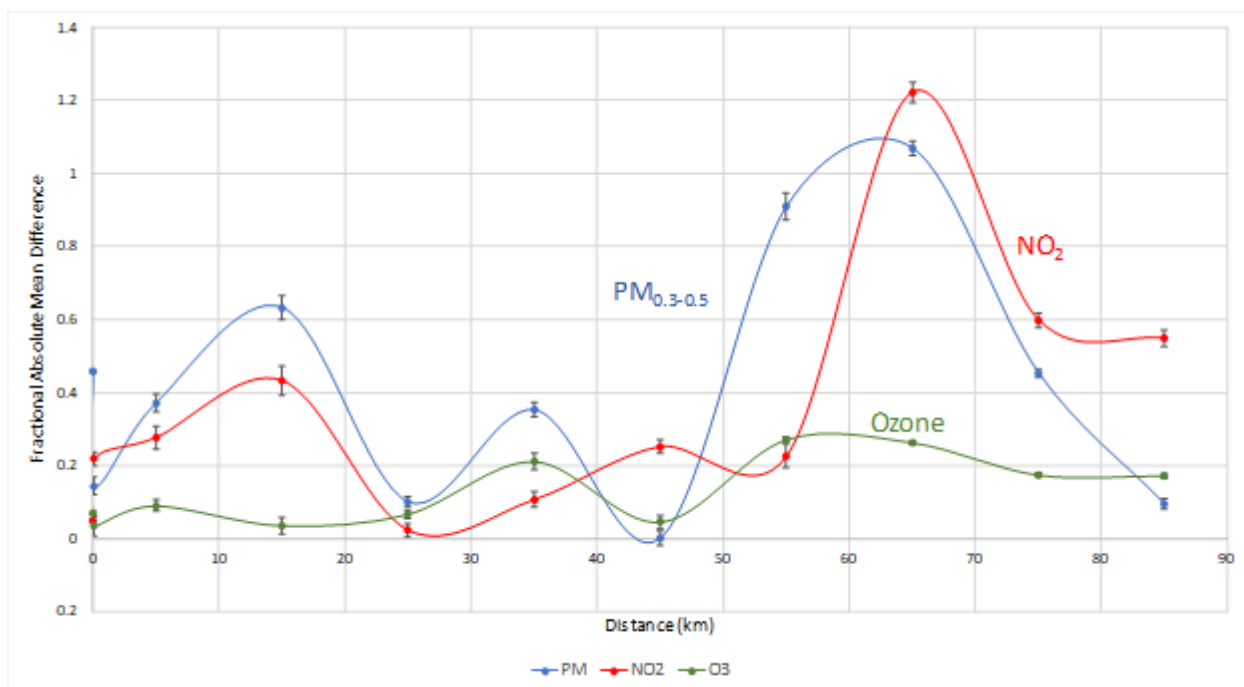

Figure S17. Fractional absolute mean differences (FAMD) for NO<sub>2</sub>, O<sub>3</sub>, and particle number (0.3 – 0.5  $\mu$ m) versus distance between mobile platforms (Coltrane and Flora) during sampling in the San Joaquin Valley on Nov 16, 2016.

Table S2. Mean NO<sub>2</sub> concentrations and differences when vehicle pairs sampled different areas within the northern San Joaquin Valley. Vehicles A and B correspond to the first and second areas sampled, respectively. Sample sizes differ for the two vehicles. Mean concentrations were determined from all available data for each vehicle. Mean and fractional mean differences were determined from paired 1-s measurements reported by both vehicles. Uncertainties are one standard error.

| Date   | Areas Sampled       | Car <sup>1</sup><br>A–B | N <sup>2</sup> | Mean NO <sub>2</sub><br>Vehicle A<br>(ppbv) <sup>3</sup> | Mean NO <sub>2</sub><br>Vehicle B<br>(ppbv) <sup>3</sup> | Mean NO <sub>2</sub><br>Difference<br>(ppbv) <sup>3</sup> | Fractional<br>Mean<br>Difference |
|--------|---------------------|-------------------------|----------------|----------------------------------------------------------|----------------------------------------------------------|-----------------------------------------------------------|----------------------------------|
| Nov 16 | Stockton – Rural    | F–C                     | 6724           | 11.3 ± 0.09                                              | 8.3 ± 0.2                                                | 2.9 ± 0.2                                                 | 0.30 ± 0.02                      |
| Nov 16 | Stockton – Tracy    | F–R                     | 8753           | 11.3 ± 0.09                                              | 7.1 ± 0.1                                                | 4.2 ± 0.1                                                 | 0.46 ± 0.02                      |
| Nov 17 | Stockton – Manteca  | C–F                     | 10982          | 6.9 ± 0.06                                               | 8.0 ± 0.09                                               | -1.2 ± 0.1                                                | -0.16 ± 0.01                     |
| Nov 17 | Stockton – Stockton | C–R                     | 10457          | 6.9 ± 0.06                                               | 6.8 ± 0.06                                               | 0.05 ± 0.08                                               | 0.007 ± 0.01                     |
| Nov 17 | Stockton – Manteca  | R–F                     | 11168          | 6.8 ± 0.06                                               | 8.0 ± 0.09                                               | -1.3 ± 0.1                                                | -0.18 ± 0.01                     |
| Nov 18 | East – West SJV     | F–C                     | 7826           | 11.0 ± 0.2                                               | 13.8 ± 0.2                                               | -3.7 ± 0.2                                                | -0.30 ± 0.02                     |
| Nov 18 | East – West SJV     | R–C                     | 7220           | 12.8 ± 0.1                                               | 13.8 ± 0.2                                               | -3.1 ± 0.1                                                | -0.23 ± 0.02                     |
| Nov 21 | East – West SJV     | F–R                     | 8554           | 5.8 ± 0.07                                               | 7.6 ± 0.08                                               | -2.0 ± 0.1                                                | -0.30 ± 0.02                     |
| Nov 21 | East – West SJV     | C–R                     | 7914           | 10.6 ± 0.1                                               | 7.6 ± 0.08                                               | 2.7 ± 0.2                                                 | 0.30 ± 0.02                      |
| Nov 22 | Stockton – Modesto  | F–C                     | 9368           | 16.1 ± 0.1                                               | 9.9 ± 0.1                                                | 6.1 ± 0.1                                                 | 0.49 ± 0.01                      |
| Nov 22 | Stockton – Modesto  | F–R                     | 9063           | 16.1 ± 0.1                                               | 7.7 ± 0.06                                               | 8.3 ± 0.1                                                 | 0.70 ± 0.01                      |
| Nov 23 | Stockton – Modesto  | F–R                     | 11638          | 12.3 ± 0.1                                               | 12.8 ± 0.09                                              | -1.1 ± 0.1                                                | -0.09 ± 0.01                     |
| Nov 23 | Stockton – Highway  | F–C                     | 9898           | 12.3 ± 0.1                                               | 13.9 ± 0.1                                               | -1.2 ± 0.1                                                | -0.09 ± 0.01                     |

<sup>1</sup> C = Coltrane, F = Flora, R = Rhodes

<sup>2</sup> Number of paired samples

<sup>3</sup> Vehicle means determined from all measurements made by the vehicle; mean difference determined from paired measurements made by both vehicles

Table S3. Mean NO concentrations and differences when vehicle pairs sampled different areas within the northern San Joaquin Valley. Vehicles A and B correspond to the first and second areas sampled, respectively. Sample sizes differ for the two vehicles. Mean concentrations were determined from all available data for each vehicle. Mean and fractional mean differences were determined from paired 1-s measurements reported by both vehicles. Uncertainties are one standard error.

| Date   | Areas Sampled       | Car <sup>1</sup><br>A–B | N <sup>2</sup> | Mean NO<br>Vehicle A<br>(ppbv) <sup>3</sup> | Mean NO<br>Vehicle B<br>(ppbv) <sup>3</sup> | Mean NO<br>Difference<br>(ppbv) <sup>3</sup> | Fractional<br>Mean<br>Difference |
|--------|---------------------|-------------------------|----------------|---------------------------------------------|---------------------------------------------|----------------------------------------------|----------------------------------|
| Nov 16 | Stockton – Rural    | F–C                     | 6783           | 20.0 ± 0.5                                  | 23.5 ± 1.0                                  | -3.7 ± 1.2                                   | -0.30 ± 0.02                     |
| Nov 16 | Stockton – Tracy    | F–R                     | 8470           | 20.0 ± 0.5                                  | NA                                          | NA                                           | NA                               |
| Nov 17 | Stockton – Manteca  | C–F                     | 10152          | 26.8 ± 0.5                                  | 14.4 ± 0.3                                  | 12.6 ± 0.6                                   | 0.61 ± 0.03                      |
| Nov 17 | Stockton – Stockton | C–R                     | 10990          | 26.8 ± 0.5                                  | NA                                          | NA                                           | NA                               |
| Nov 17 | Stockton – Manteca  | R–F                     | 10815          | NA                                          | 14.4 ± 0.3                                  | NA                                           | NA                               |
| Nov 18 | East – West SJV     | F–C                     | 7621           | 13.0 ± 0.3                                  | 25.0 ± 0.7                                  | -11.7 ± 0.8                                  | -0.61 ± 0.05                     |
| Nov 18 | East – West SJV     | R–C                     | 8262           | NA                                          | 25.0 ± 0.7                                  | NA                                           | NA                               |
| Nov 21 | East – West SJV     | F–R                     | 8144           | 8.6 ± 0.3                                   | NA                                          | NA                                           | NA                               |
| Nov 21 | East – West SJV     | C–R                     | 8298           | 23.7 ± 0.6                                  | NA                                          | NA                                           | NA                               |
| Nov 22 | Stockton – Modesto  | F–C                     | 8632           | 23.4 ± 0.4                                  | 16.3 ± 0.4                                  | 7.1 ± 0.7                                    | 0.36 ± 0.03                      |
| Nov 22 | Stockton – Modesto  | F–R                     | 9143           | 23.4 ± 0.4                                  | NA                                          | NA                                           | NA                               |
| Nov 23 | Stockton – Modesto  | F–R                     | 11959          | 25.5 ± 0.5                                  | NA                                          | NA                                           | NA                               |
| Nov 23 | Stockton – Highway  | F–C                     | 10820          | 25.5 ± 0.5                                  | 16.9 ± 0.4                                  | 8.4 ± 0.7                                    | 0.40 ± 0.03                      |

<sup>1</sup> C = Coltrane, F = Flora, R = Rhodes

<sup>2</sup> Number of paired samples if two vehicles made measurements; single vehicle count otherwise

<sup>3</sup> Vehicle means determined from all measurements made by the vehicle; mean difference determined from paired measurements made by both vehicles

Table S4. Mean O<sub>3</sub> concentrations and differences when vehicle pairs sampled different areas within the northern San Joaquin Valley. Vehicles A and B correspond to the first and second areas sampled, respectively. Sample sizes differ for the two vehicles. Mean concentrations were determined from all available data for each vehicle. Mean and fractional mean differences were determined from paired 1-s measurements reported by both vehicles. Uncertainties are one standard error.

| Date   | Areas Sampled       | Car <sup>1</sup><br>A–B | N <sup>2</sup> | Mean O <sub>3</sub><br>Vehicle A<br>(ppbv) <sup>3</sup> | Mean O <sub>3</sub><br>Vehicle B<br>(ppbv) <sup>3</sup> | Mean O <sub>3</sub><br>Difference<br>(ppbv) <sup>3</sup> | Fractional<br>Mean<br>Difference |
|--------|---------------------|-------------------------|----------------|---------------------------------------------------------|---------------------------------------------------------|----------------------------------------------------------|----------------------------------|
| Nov 16 | Stockton – Rural    | F–C                     | 3034           | 33.1 ± 0.08                                             | 40.6 ± 0.1                                              | -8.8 ± 0.1                                               | -0.24 ± 0.004                    |
| Nov 16 | Stockton – Tracy    | F–R                     | 4276           | 33.1 ± 0.08                                             | NA                                                      | NA                                                       | NA                               |
| Nov 17 | Stockton – Manteca  | C–F                     | 3795           | 25.7 ± 0.09                                             | 26.5 ± 0.08                                             | -0.3 ± 0.1                                               | 0.01 ± 0.004                     |
| Nov 17 | Stockton – Stockton | C–R                     | 5866           | 25.7 ± 0.09                                             | NA                                                      | NA                                                       | NA                               |
| Nov 17 | Stockton – Manteca  | R–F                     | 5820           | NA                                                      | 26.5 ± 0.08                                             | NA                                                       | NA                               |
| Nov 18 | East – West SJV     | F–C                     | 3957           | 40.8 ± 0.09                                             | NA                                                      | NA                                                       | NA                               |
| Nov 18 | East – West SJV     | R–C                     | 0              | NA                                                      | NA                                                      | NA                                                       | NA                               |
| Nov 21 | East – West SJV     | F–R                     | 3782           | 31.6 ± 0.06                                             | NA                                                      | NA                                                       | NA                               |
| Nov 21 | East – West SJV     | C–R                     | 4520           | 28.4 ± 0.09                                             | NA                                                      | NA                                                       | NA                               |
| Nov 22 | Stockton – Modesto  | F–C                     | 1020           | 17.8 ± 0.1                                              | 26.0 ± 0.08                                             | -9.3 ± 0.2                                               | -0.42 ± 0.01                     |
| Nov 22 | Stockton – Modesto  | F–R                     | 2339           | 17.8 ± 0.1                                              | NA                                                      | NA                                                       | NA                               |
| Nov 23 | Stockton – Modesto  | F–R                     | 1370           | 36.6 ± 0.08                                             | NA                                                      | NA                                                       | NA                               |
| Nov 23 | Stockton – Highway  | F–C                     | 665            | 36.6 ± 0.08                                             | 33.0 ± 0.08                                             | 8.4 ± 0.7                                                | 0.18 ± 0.006                     |

<sup>1</sup> C = Coltrane, F = Flora, R = Rhodes

<sup>2</sup> Number of paired samples if two vehicles made measurements; single vehicle count otherwise

<sup>3</sup> Vehicle means determined from all measurements made by the vehicle; mean difference determined from paired measurements made by both vehicles

Table S5. Mean PM<sub>0.3-0.5</sub> number counts and differences when vehicle pairs sampled different areas within the northern San Joaquin Valley. Vehicles A and B correspond to the first and second areas sampled, respectively. Sample sizes differ for the two vehicles. Mean concentrations were determined from all available data for each vehicle. Mean and fractional mean differences were determined from paired 1-s measurements reported by both vehicles. Uncertainties are one standard error.

| Date   | Areas Sampled       | Car <sup>1</sup><br>A-B | N <sup>2</sup> | Mean PM<br>Vehicle A<br>(L <sup>-1</sup> ) <sup>3</sup> | Mean PM<br>Vehicle B<br>(L <sup>-1</sup> ) <sup>3</sup> | Mean PM<br>Difference<br>(L <sup>-1</sup> ) <sup>3</sup> | Fractional<br>Mean<br>Difference |
|--------|---------------------|-------------------------|----------------|---------------------------------------------------------|---------------------------------------------------------|----------------------------------------------------------|----------------------------------|
| Nov 16 | Stockton – Rural    | F-C                     | 9026           | 9708 ± 80                                               | 3413 ± 18                                               | 6310 ± 84                                                | 0.96 ± 0.01                      |
| Nov 16 | Stockton – Tracy    | F-R                     | 8981           | 9708 ± 80                                               | 8405 ± 87                                               | 1283 ± 120                                               | 0.14 ± 0.01                      |
| Nov 17 | Stockton – Manteca  | C-F                     | 11483          | 23676 ± 62                                              | 23276 ± 91                                              | 427 ± 98                                                 | 0.02 ± 0.004                     |
| Nov 17 | Stockton – Stockton | C-R                     | 11282          | 23676 ± 62                                              | 26340 ± 74                                              | -2665 ± 72                                               | 0.11 ± 0.003                     |
| Nov 17 | Stockton – Manteca  | R-F                     | 11506          | 26340 ± 74                                              | 23276 ± 91                                              | 3070 ± 106                                               | 0.12 ± 0.004                     |
| Nov 18 | East – West SJV     | F-C                     | 8791           | 86607 ± 99                                              | 68678 ± 303                                             | 17775 ± 317                                              | 0.23 ± 0.004                     |
| Nov 18 | East – West SJV     | R-C                     | 8499           | 81074 ± 207                                             | 68678 ± 303                                             | 10511 ± 313                                              | 0.14 ± 0.004                     |
| Nov 21 | East – West SJV     | F-R                     | 8832           | 15457 ± 118                                             | 17691 ± 104                                             | -2125 ± 129                                              | -0.13 ± 0.008                    |
| Nov 21 | East – West SJV     | C-R                     | 8603           | 21982 ± 128                                             | 17691 ± 104                                             | 4552 ± 126                                               | 0.23 ± 0.006                     |
| Nov 22 | Stockton – Modesto  | F-C                     | 9635           | 46883 ± 203                                             | 42176 ± 168                                             | 4512 ± 230                                               | 0.10 ± 0.005                     |
| Nov 22 | Stockton – Modesto  | F-R                     | 9563           | 46883 ± 203                                             | 52864 ± 168                                             | -5788 ± 300                                              | -0.12 ± 0.006                    |
| Nov 23 | Stockton – Modesto  | F-R                     | 12642          | 6675 ± 114                                              | 13070 ± 77                                              | -6384 ± 144                                              | -0.65 ± 0.02                     |
| Nov 23 | Stockton – Highway  | F-C                     | 12621          | 6675 ± 114                                              | 11954 ± 71                                              | -5267 ± 140                                              | -0.57 ± 0.02                     |

<sup>1</sup> C = Coltrane, F = Flora, R = Rhodes

<sup>2</sup> Number of paired samples

<sup>3</sup> Vehicle means determined from all measurements made by the vehicle; mean difference determined from paired measurements made by both vehicles
